# Supplementary material
Source: publisher figshare collection journal article supplement (https://tandf.figshare.com/articles/dataset/_/21829293)
Supplement: Supplementary file 1 [file 1]

Supplementary Figure

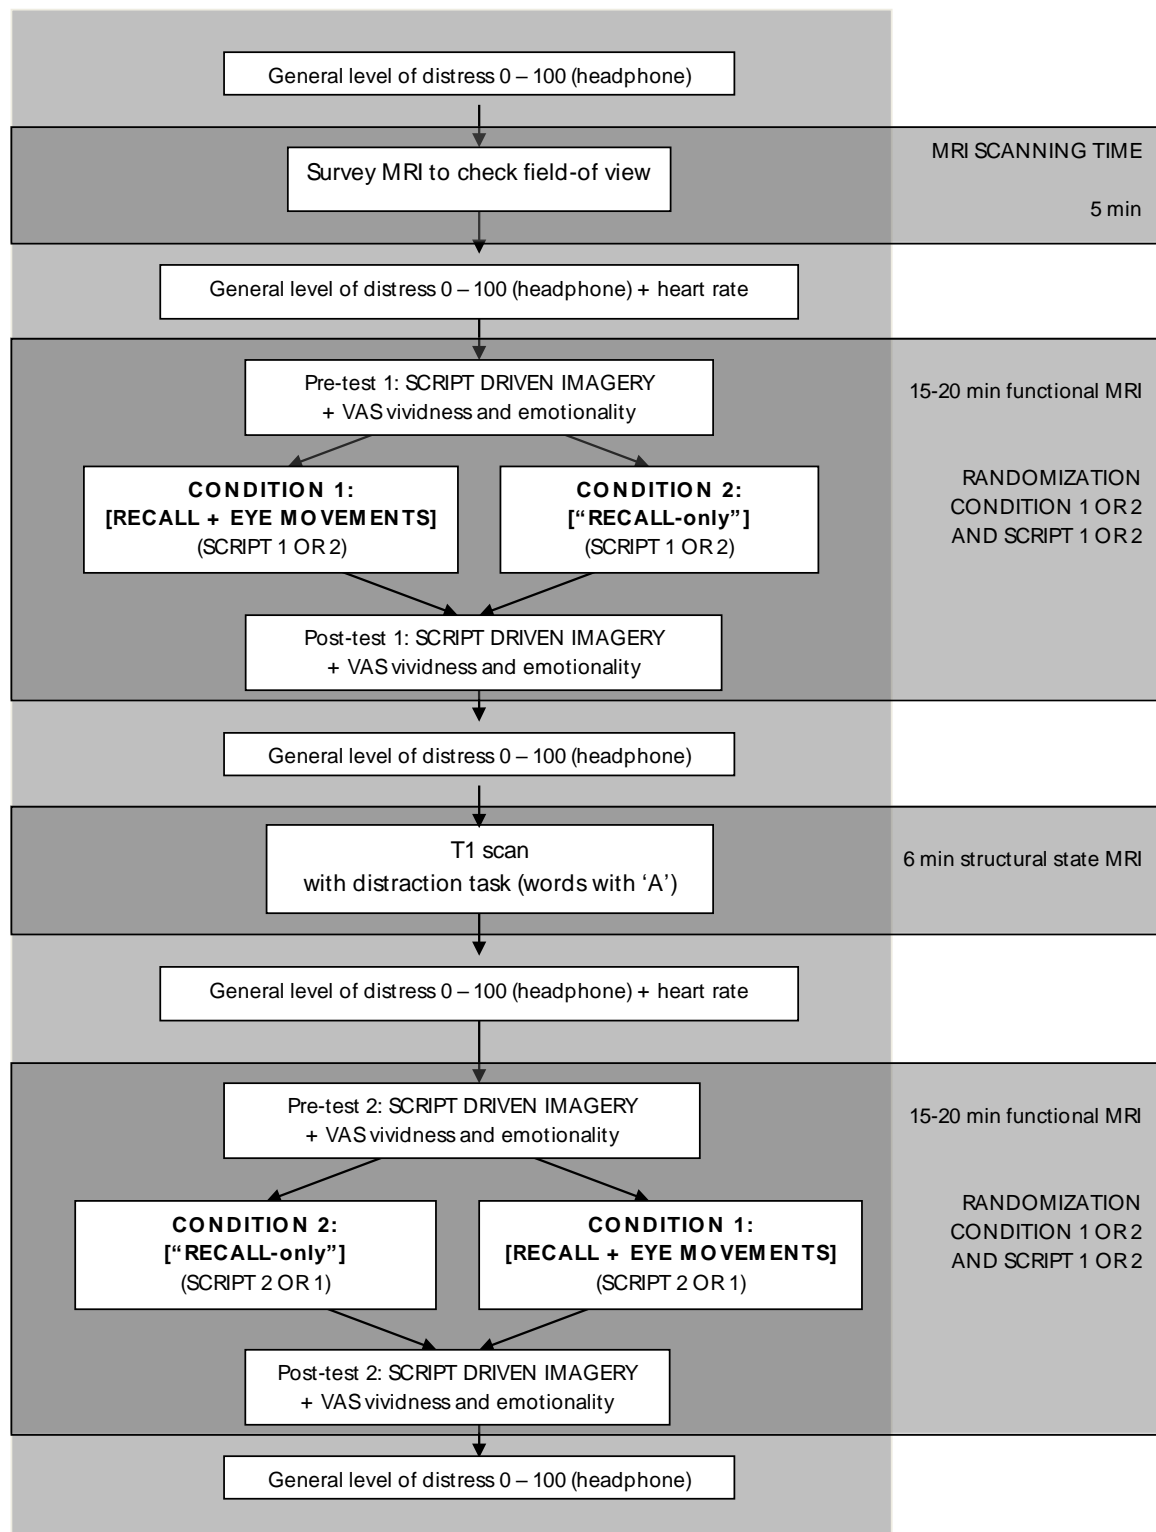

Supplementary Figure: Flow chart of the MRI protocol. The order of conditions 1 ‘recall with eye movements’ and condition 2 ‘recall-only’ are randomized, as well as the order of the personal trauma scripts (2 hot spots of one traumatic event).
