# Supplementary material
Source: publisher figshare collection journal article supplement (https://tandf.figshare.com/articles/dataset/_/21829293)
Supplement: Supplementary file 2 [file 1]

Degradowanie traumatycznych wspomnień z wykorzystaniem EMDR: pilotażowe badanie z wykorzystaniem MRI.

Kathleen Thomaes, Iris M. Engelhard, Marit Sijbrandij, Danielle C. Cath, Odile A. van den Heuvel

Wprowadzenie: EMDR jest skuteczną terapią PTSD. Podczas EMDR pacjent jest konfrontowany z różnego rodzaju wspomnieniami traumatycznymi. Dzięki ruchowi gałek ocznych można istotnie zmniejszyć emocjonalne nasilenie wspomnień traumatycznych. Niewiele wiadomo na temat neurobiologicznych podstaw skuteczności tej metody.

Metoda: w badaniu tym wykorzystano rezonans magnetyczny (fMRI) do oceny stopnia nasilenia emocjonalności obrazów wspomnień traumatycznych. Przeprowadziliśmy zrandomizowany, kontrolowany eksperyment wśród 8 pacjentów z PTSD. Wykorzystano procedurę "script-driven imagery (SDI)" do oceny stopnia responsywności pacjentów na badane traumatyczne wspomnienia.

Wyniki: SDI aktywowało te regiony mózgu, które były odpowiedzialne za przetwarzanie emocjonalne, pamięć operacyjną.

Konkluzje: wstępne wyniki badań potwierdzają, że EMDR może powodować zmniejszenie emocjonalnego przetwarzania bądź ładunku emocjonalnego obrazów traumatycznych, a przez to być skuteczną metodą w leczeniu PTSD.

Słowa kluczowe: zaburzenie po stresie traumatycznym( PTSD); EMDR; pamięć operacyjna; ciała migdałowate; MRI

Name of translator: Marcin Rzeszutek, Faculty of Psychology, University of Warsaw, Poland

Citation: European Journal of Psychotraumatology 2016, 7: 31371 - <http://dx.doi.org/10.3402/ejpt.v7.31371>
