# Supplementary material
Source: publisher figshare collection journal article supplement (https://tandf.figshare.com/articles/dataset/_/21829293)
Supplement: Supplementary file 3 [file 1]

## **La degradación de los recuerdos traumáticos con movimientos oculares: Un estudio piloto de IRMf en el TEPT**

Kathleen Thomaes, Iris M. Engelhard, Marit Sijbrandij, Danielle C. Cath, Odile A. van den Heuvel

**Introducción:** La desensibilización y el reprocesamiento mediante movimientos oculares (EMDR, por sus siglas en inglés) es un tratamiento efectivo para el trastorno por estrés postraumático (TEPT). Durante EMDR, el paciente rememora recuerdos traumáticos mientras hace movimientos oculares (MO). Hacer MO mientras se recuerda está asociado a una disminución de la intensidad y la emotividad de los recuerdos traumáticos, pero el mecanismo subyacente ha sido poco claro. Estudios recientes apoyan una teoría de la "memoria de trabajo" teoría (WM), que afirma que las dos tareas (el recordar y los MO) compiten por una limitada capacidad de recursos de la WM. Sin embargo, estudios anteriores se han basado principalmente en medidas de autoinforme.

**Métodos:** Utilizando imágenes de resonancia magnética funcional (IRMf), comprobamos si el "recordar con MO", en relación a una condición de control de "sólo recordar", estaba asociado a una actividad reducida de las principales áreas cerebrales de procesamiento visual y emocional, asociadas con la viveza y la emotividad, respectivamente, y a un aumento de la actividad de la corteza prefrontal dorsolateral (CPFDL), asociada con la memoria de trabajo. Se utilizó un diseño experimental cruzado controlado y aleatorizado en 8 pacientes adultos con un diagnóstico principal de trastorno por estrés postraumático. Se utilizó un procedimiento de visualización guiado por un script (SDI, por sus siglas en inglés) para medir la capacidad de respuesta a un script o guión en audio que representa el recuerdo traumático del participante antes y después de las condiciones.

**Resultados:** La SDI activó principalmente las regiones cerebrales relacionadas con el procesamiento emocional (ínsula anterior, corteza cingulada anterior rostral [CCA] y corteza prefrontal dorsomedial), regiones relacionadas con la memoria de trabajo (córtex prefrontal dorsolateral) y regiones cerebrales visuales (asociación) antes de ambas condiciones. Aunque la predicción de una disminución de pre- a post-test en la activación de la amígdala después de "recordar con MO" no fue significativa, la SDI activó menos actividad de la amígdala derecha y de la CCA rostral después de "recordar con MO" en comparación con sólo después de "sólo recordar". Más aún, la conectividad funcional desde la amígdala derecha a la CCA rostral disminuyó después de "recordar con MO" en comparación con después de "sólo recordar".

**Conclusiones:** Estos resultados preliminares en una pequeña muestra sugieren hacer MO mientras se recuerda, que forma parte del protocolo habitual de tratamiento EMDR, podría reducir la actividad y la conectividad en áreas relacionadas con el procesamiento emocional. Este estudio justifica que se reproduzca en una muestra más grande

**Keywords:** trastorno por estrés postraumático (TEPT); desensibilización y reprocesamiento mediante movimientos oculares (EMDR); memoria de trabajo; amígdala; imagen por resonancia magnética funcional (IRM)

Name of translator: Miriam Ramos Morrison
