# Supplementary material
Source: publisher figshare collection journal article supplement (https://tandf.figshare.com/articles/dataset/_/21829293)
Supplement: Supplementary file 4 [file 1]

# 用眼动消除创伤记忆：PTSD 患者的功能 MRI 研究

Authors

## Abstract

介绍：眼动脱敏和再加工（EMDR）是有效治疗创伤后应激障碍（PTSD）的方法。在进行 EMDR 时候，患者需要回忆创伤记忆同时进行眼动。在回忆时进行眼动可以减少创伤记忆的鲜活度和情感强度，但是潜在的机制还不清楚。最近的研究支持“工作记忆”理论，该理论强调同时进行两个任务（回忆和眼动）会竞争有限的工作记忆资源。但是，先前的研究更多依靠自我评估。

方法：使用功能核磁共振（fMRI），我们检查了回忆的同时进行眼动和单纯回忆比较，是否大脑初级视觉皮层和情感加工区域活动减少，该区域与情感和记忆鲜活度有关，而背外侧前额叶皮层（DLPFC）活动增加，该区域与工作记忆有关。我们采用了随机对照、交叉设计，纳入了 8 位成年 PTSD 患者。采用脚本驱动想像（SDI）程序在声音模拟患者创伤记忆前后评估情感的反应性。

结果：在两种情况下，SDI 都主要激活情感加工相关脑区（前岛叶、前扣带回嘴部（ACC）、背外侧前额叶皮层），工作记忆相关脑区（DLPFC），视觉相关脑区。尽管杏仁核活性在回忆伴随眼动任务前后的减少不像预计的有显著性，与单纯回忆相比，回忆时进行眼动组在 SDI 激活右侧杏仁核和背侧 ACC 更少，而且，右侧杏仁核到背侧 ACC 的功能链接在回忆时进行眼动组比单纯回忆组减少。

结论：这个小样本的初步研究结果提示，回忆时进行眼动作为标准 EMDR 治疗的一部分，可能有减少情感加工区域的活动及功能链接的作用。本研究结果需要在更大样本重复。

Keywords: 创伤后应激障碍（PTSD）、眼动脱敏和再加工、工作记忆、杏仁核、功能 MRI

Name of translator: Zhonglin Tan

European Journal of Psychotraumatology 2016, 7: 31371 - <http://dx.doi.org/10.3402/ejpt.v7.31317>
